# Supplementary material for: Cyclooxygenase-2 Glycosylation Is Affected by Peroxynitrite in Endothelial Cells: Impact on Enzyme Activity and Degradation
Source: PubMed Central journal article supplement (PMC8005028; doi:10.3390/antiox10030496), 2021-03-23
Supplement: antioxidants-10-00496-s001.pdf [file antioxidants-10-00496-s001.pdf]

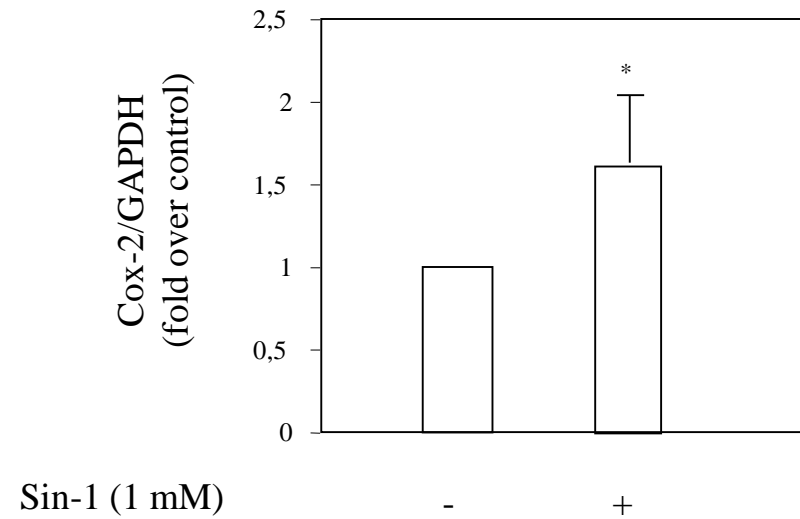

**Figure S1.** COX-2 mRNA levels. Cells were incubated with 1 mM SIN-1 for 6 h. COX-2 mRNA levels were evaluated by Northern analysis. GAPDH mRNA was used as a control of the mRNA loading. Results are representative of 6 independent experiments; \*p<0.05.

**D**

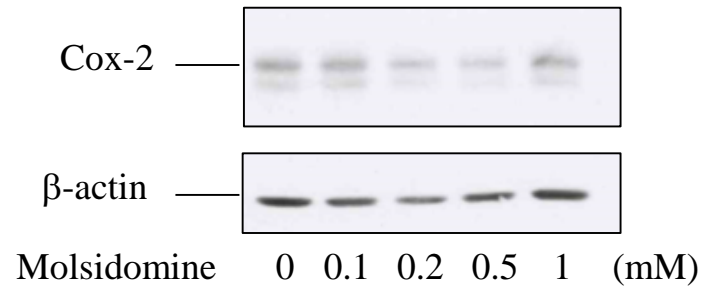

**Figure S2.** Effect of Molsidomine on Cox-2 expression. HUVEC were incubated for 18 hours with Molsidomine, the inactive precursor of SIN-1. Cox-2 expression was evaluated by Western blot analysis.  $\beta$ -actin was used as a control of protein loading.
